# Supplementary material for: Prediction of Prognosis, Immunotherapy and Chemotherapy with an Immune-Related Risk Score Model for Endometrial Cancer
Source: MDPI journal article supplement (doi:10.3390/cancers15143673), 2023-07-19
Supplement: s1 [file s1]

# Prediction of Prognosis, Immunotherapy and Chemotherapy with an Immune-related Risk Score Model in Endometrial Cancer

Wei Wei, Bo Ye, Zhenting Huang, Xiaoling Mu, Jing Qiao, Peng Zhao, Yuehang Jiang, Jingxian Wu and Xiaohui Zhan

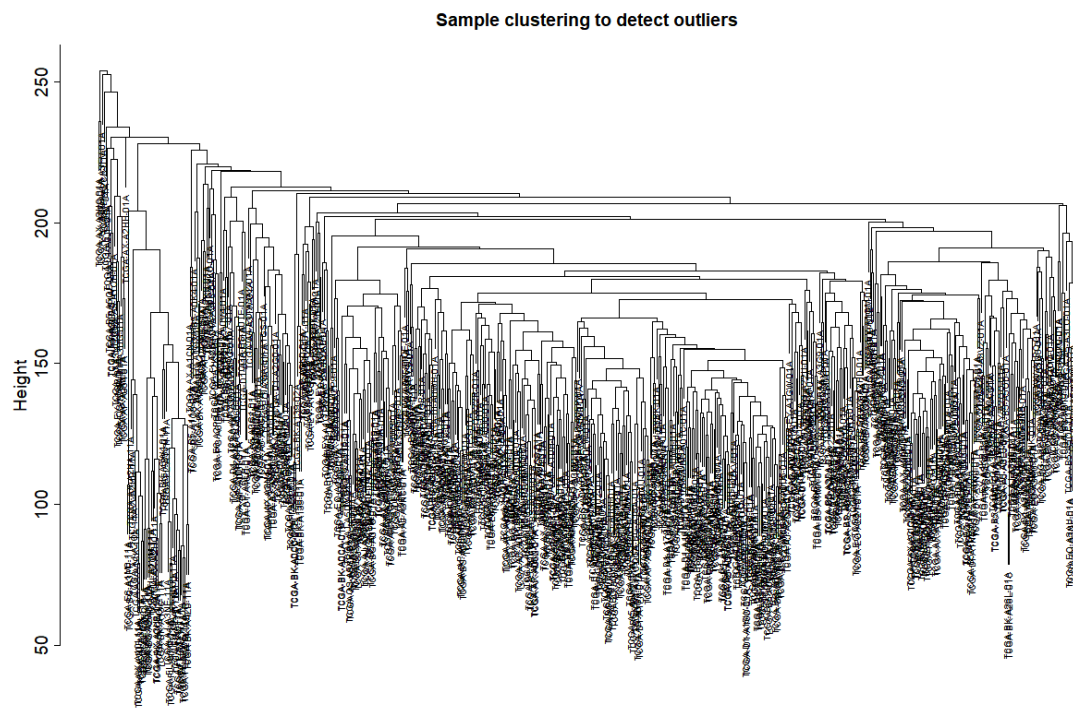

**Figure S1.** Sample clustering to detect outliers.

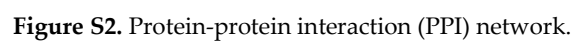

**Figure S2.** Protein-protein interaction (PPI) network.

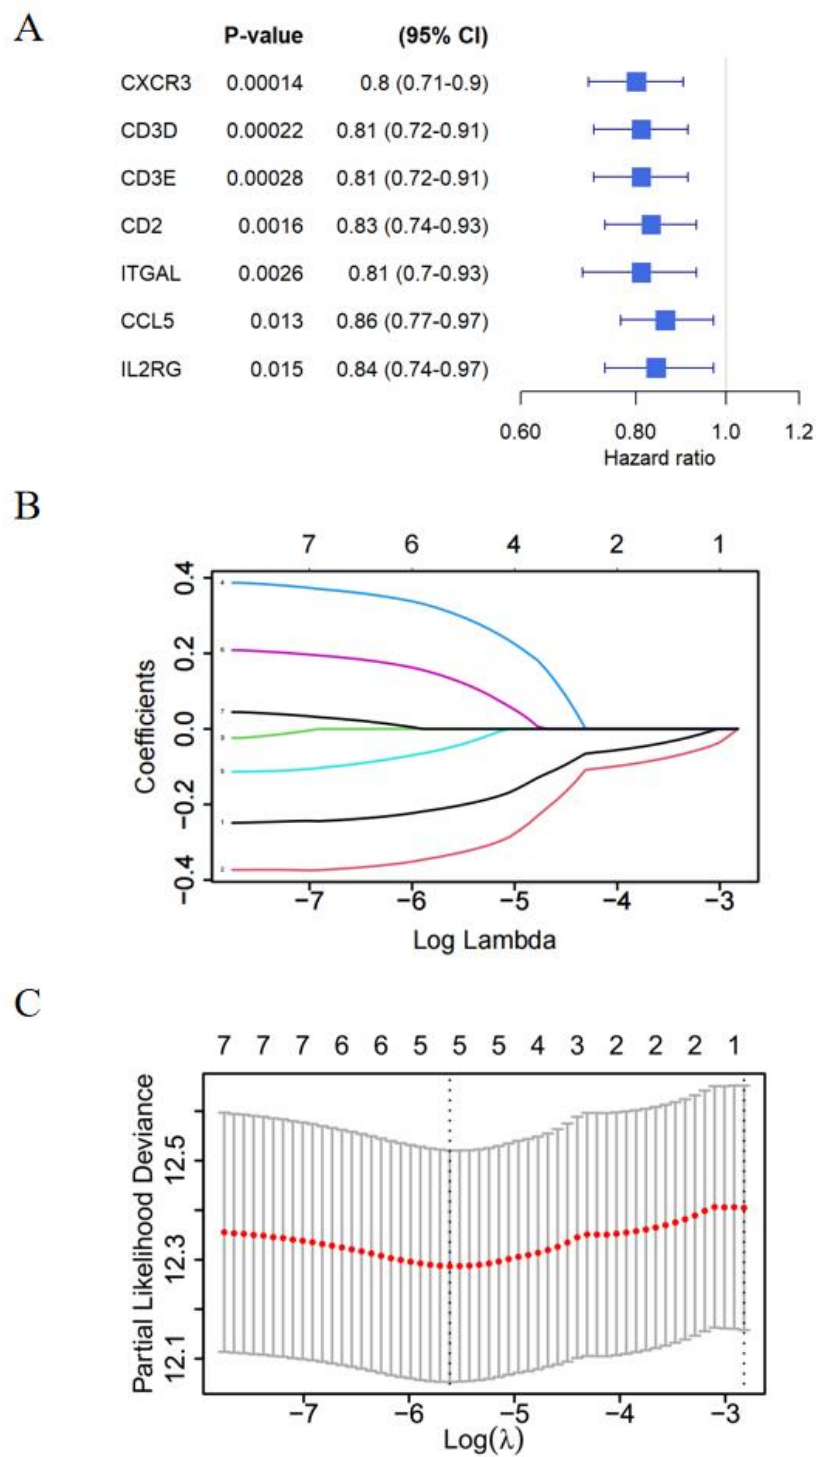

**Figure S3. The construction of IRSM.** (A) Univariate Cox regression analysis of immune-related key genes. (B) Lasso regression coefficient. (C) The selection of lambda for Lasso regression.
